# Supplementary material for: A novel formation mechanism of sulfamic acid and its enhancing effect on methanesulfonic acid–methylamine aerosol particle formation in agriculture-developed and coastal industrial areas
Source: Copernicus journal article supplement (doi:10.5194/acp-25-2829-2025), 2025-03-07
Supplement: Supplementary file 2 [file acp-25-2829-2025-supplement.zip]

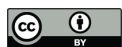

## *Supplement of*

# **A novel formation mechanism of sulfamic acid and its enhancing effect on methanesulfonic acid–methylamine aerosol particle formation in agriculture-developed and coastal industrial areas**

Hui Wang et al.

*Correspondence to:* Chongqin Zhu (cqzhu@bnu.edu.cn) and Tianlei Zhang (ztianlei88@163.com)

- acp-25-2829-2025-supplement-title-page.pdf
- Movie S1.mp4
- Movie S2.mp4
- Movie S3.mp4
- Movie S4.mp4
- Movie S5.mp4
- Supporting information.pdf
- The input files for VRC-TST and MESMER calculations in the HNSO<sub>2</sub> hydrolysis
  - H<sub>2</sub>O+HNSO<sub>2</sub>.xml
  - ch3tr1.dat

The copyright of individual parts of the supplement might differ from the article licence.
